# Supplementary material for: Novel vinyl-modified RGD conjugated silica nanoparticles based on photo click chemistry for in vivo prostate cancer targeted fluorescence imaging
Source: Royal Society of Chemistry journal article supplement (doi:10.1039/c9ra04513a), 2019-01-01
Supplement: c9ra04513a1.pdf [file c9ra04513a1.pdf]

## **Novel vinyl-modified RGD conjugated silica nanoparticles based on photo click chemistry for *in vivo* prostate cancer targeted fluorescence imaging**

Hanrui Li,<sup>a</sup> Ke Li,<sup>b</sup> Qi Zeng,<sup>a</sup> Yun Zeng,<sup>a</sup> Dan Chen,<sup>a</sup> Liaojun Pang,<sup>a</sup> Xueli Chen<sup>a</sup> and Yonghua Zhan<sup>\*a</sup>

*a. Engineering Research Center of Molecular and Neuro Imaging of the Ministry of Education, School of Life Science and Technology, Xidian University, Xi'an, Shaanxi, 710071, China. E-mail: yhzhan@xidian.edu.cn*

*b. Shaanxi Key Laboratory of Ischemic Cardiovascular Disease, Shaanxi Key Laboratory of Brain Disorders, Institute of Basic and Translational Medicine, Xi'an Medical University, Xi'an, Shaanxi, 710021, China.*

## Supplementary Data

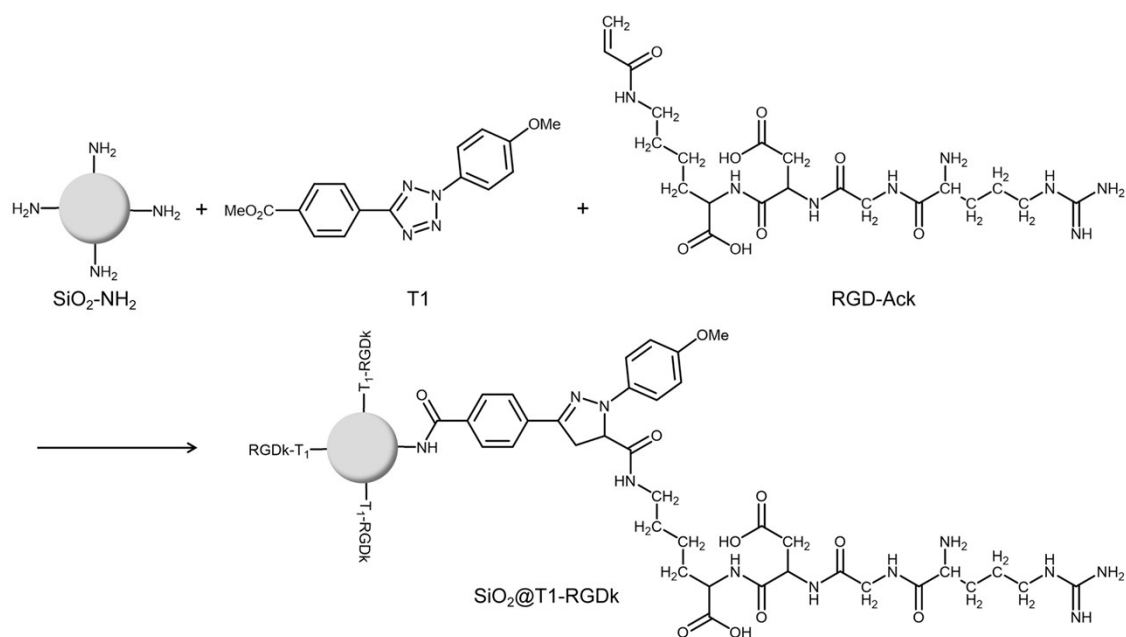

**Scheme. S1.** The reaction between amino-modified  $\text{SiO}_2$ , tetrazole compound and RGD-Ack.

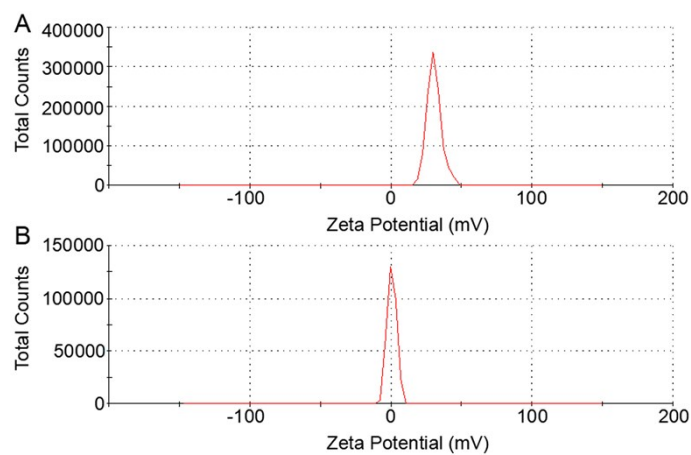

**Fig. S1.** The zeta potential of (A)  $\text{SiO}_2\text{-NH}_2$  NPs, (B)  $\text{SiO}_2\text{-T1}$ .

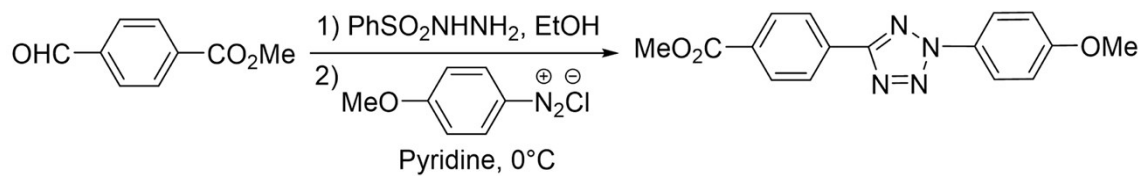

**Fig. S2.** The synthesis of tetrazole compound T1.

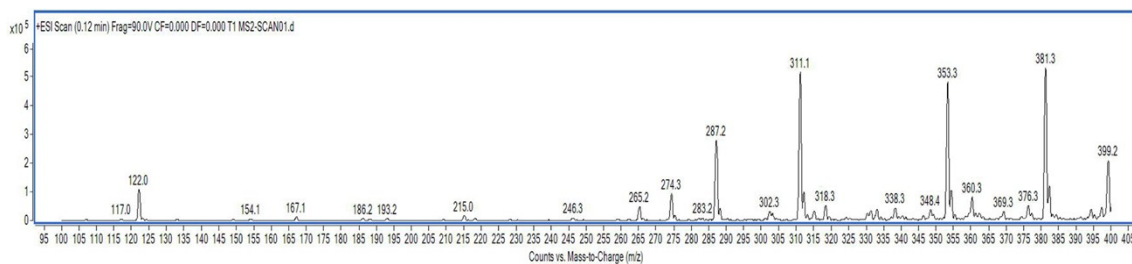

**Fig. S3.** The mass spectra (MS) of T1.

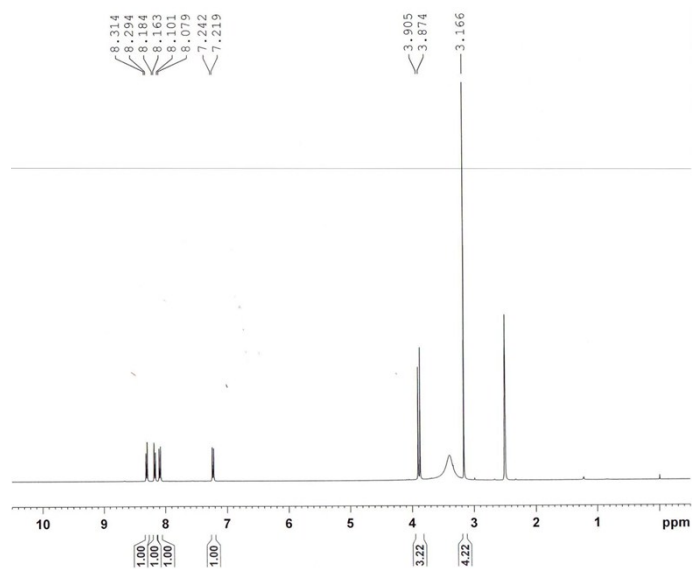

**Fig. S4.** The  $^1\text{H}$  NMR of T1.

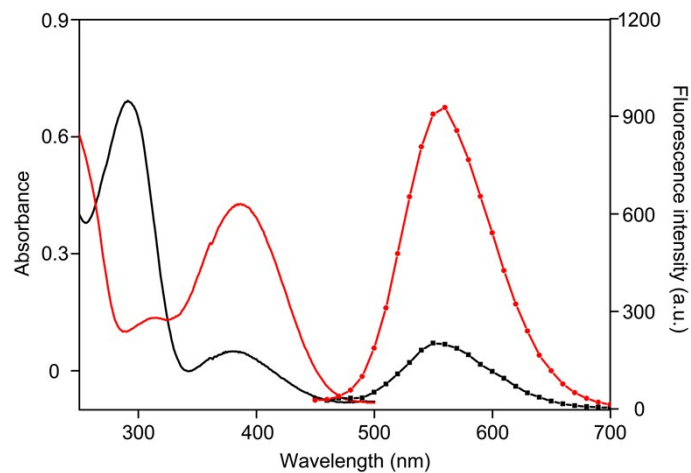

**Fig. S5.** The UV absorption and fluorescence spectra of T1-RGDk under ultraviolet light at different reaction time (the black and red curves indicate that the reaction time are 0.5 and 2 hours respectively).

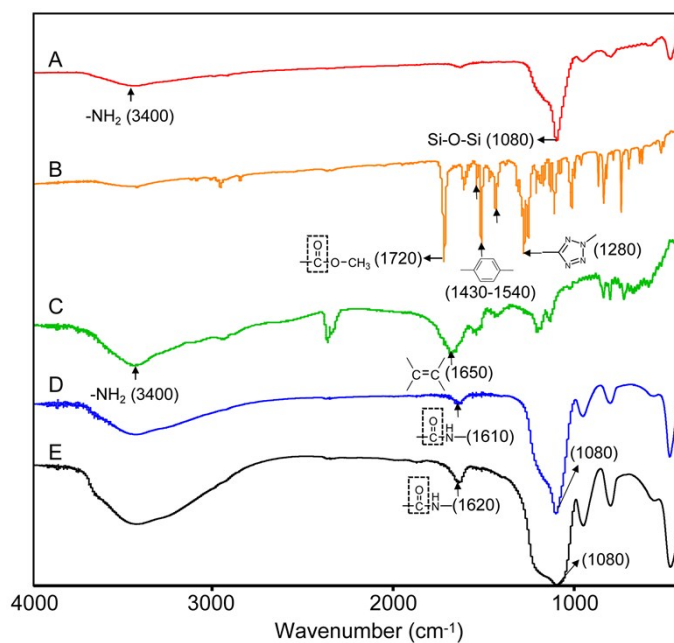

**Fig. S6.** FT-IR spectra of (A) SiO<sub>2</sub>, (B) T1, (C) RGD-Ack, (D) SiO<sub>2</sub>-T1, (E) SiO<sub>2</sub>-T1-RGDk.

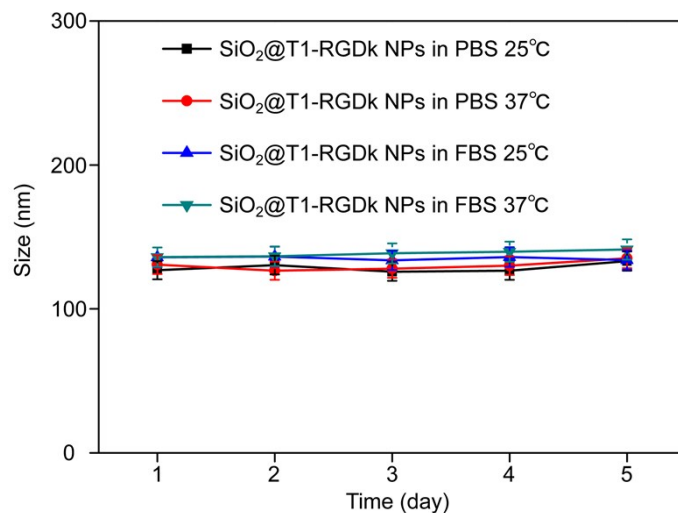

**Fig. S7.** Variation in size and stability of SiO<sub>2</sub>@T1-RGDk NPs in PBS and 10% FBS at different temperatures over a period of 5 days.

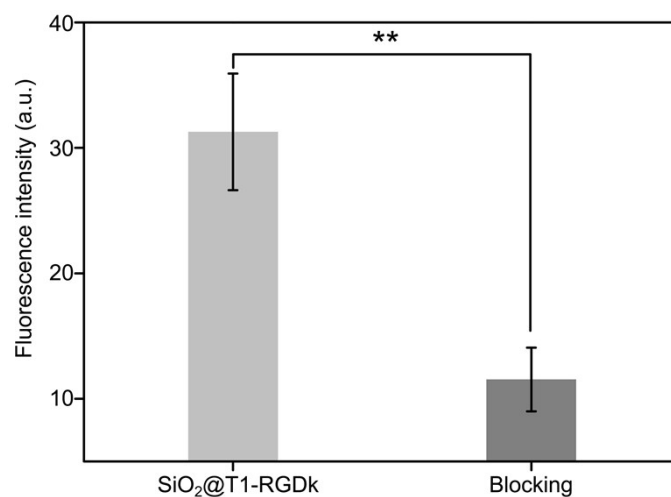

**Fig. S8.** The quantitative analysis of fluorescence intensity for SiO<sub>2</sub>@T1-RGDk NPs in cells. \*\* $P < 0.05$ ;  $n = 3$ .

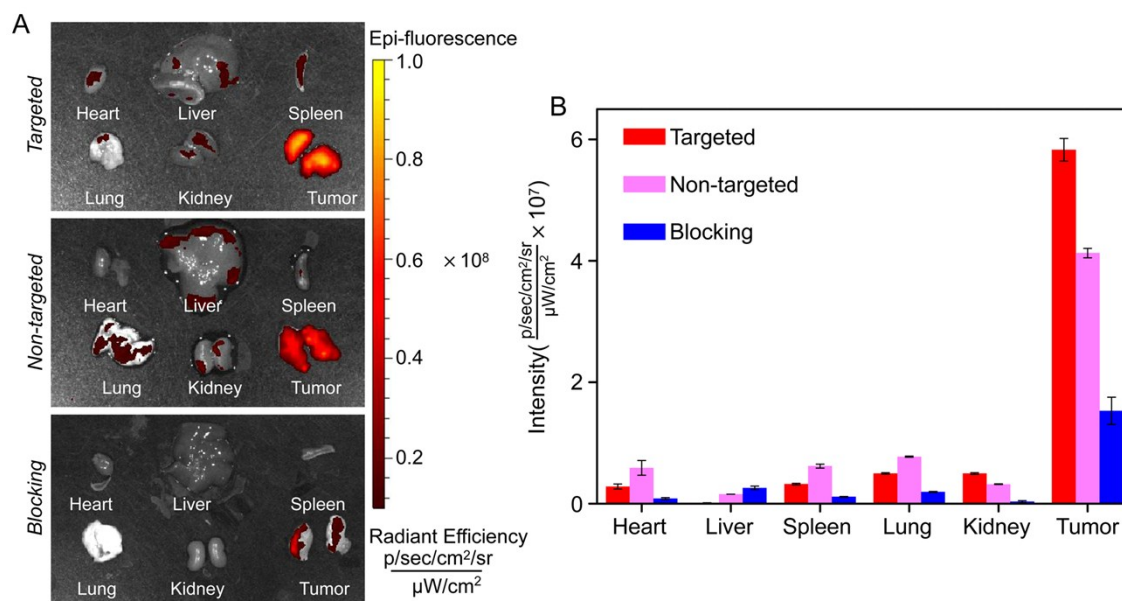

**Fig. S9.** Fluorescent images of organs and tumors in tumor-bearing mice 12 h after post-injection with SiO<sub>2</sub>@T1-RGDk NPs.
